# Supplementary material for: The optimum fire window: applying the fire-productivity hypothesis to Jurassic climate states
Source: Copernicus journal article supplement (doi:10.5194/egusphere-2023-2266), 2023-10-10
Supplement: Supplementary file 1 [file egusphere-2023-2266-supplement.pdf]

1 Supplementary Information for:  
2

3 ‘The optimum fire window: applying the fire-productivity  
4 hypothesis to Jurassic climate states.’

5  
6 Teuntje P. Hollaar\*<sup>1,2</sup>, Claire M. Belcher<sup>1</sup>, Micha Ruhl<sup>3</sup>, Jean-François Deconinck<sup>4</sup>, Stephen P.  
7 Hesselbo<sup>2,5</sup>  
8

9 <sup>1</sup>WildFIRE Lab, Global Systems Institute, University of Exeter, Exeter, EX4 4PS, UK

10 <sup>2</sup>Camborne School of Mines, Department of Earth and Environmental Sciences, University of Exeter,  
11 Penryn Campus, Penryn, TR10 9FE, UK

12 <sup>3</sup>Department of Geology, Trinity College Dublin, The University of Dublin, College Green, Dublin,  
13 Ireland

14 <sup>4</sup>Biogéosciences, UMR 6282 CNRS, Université de Bourgogne/Franche-Comté, 21000 Dijon, France

15 <sup>5</sup>Environment and Sustainability Institute, University of Exeter, Penryn Campus, Penryn, TR10 9FE,  
16 UK

17 \*Corresponding author: [t.p.hollaar@uu.nl](mailto:t.p.hollaar@uu.nl)

18

19

20

21

22

23

24

25

26

27

28

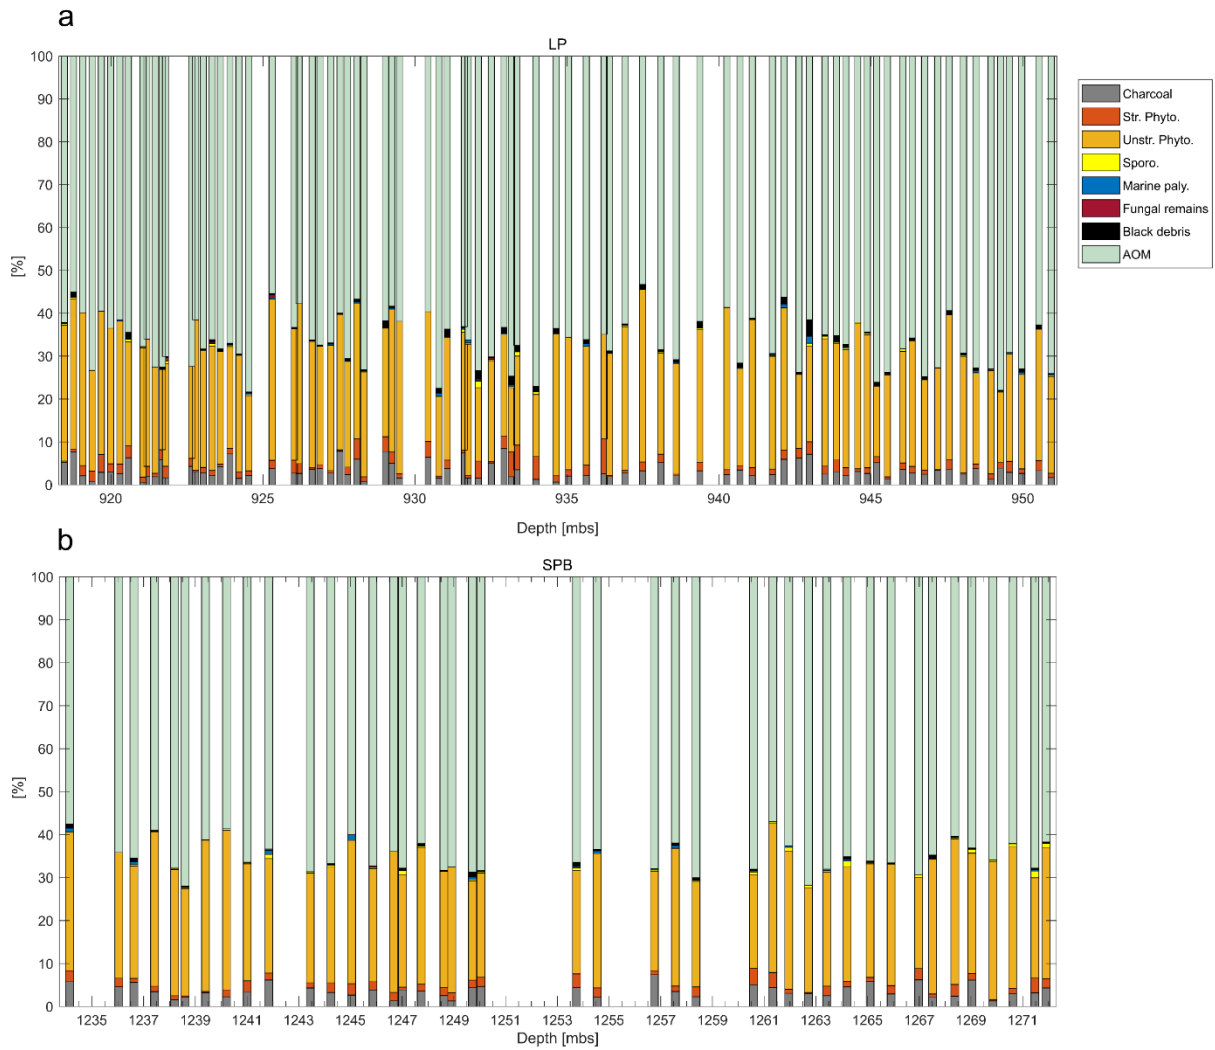

29 **SI Fig. 1:** Palynofacies of the (a) LP (published in Hollaar et al. (2021; 2023)) and (b) SPB studied  
 30 intervals of the Mochras borehole. Relative abundance of the organic particle type identified under the  
 31 reflective microscope. In each sample >300 organic particles were identified and grouped based on  
 32 Oboh-Ikuenobe et al. (2005). Amorphous Organic Matter (AOM) is >50 % in all samples and  
 33 constitutes the main bulk of the marine derived organic matter. This is followed by the group  
 34 unstructured phytoclasts, which is of terrestrial origin. Only minor changes are observed in the  
 35 relative abundance of terrestrial vs marine particulate organic matter and no abrupt or large shifts are  
 36 observed.

37

38

39

40

41

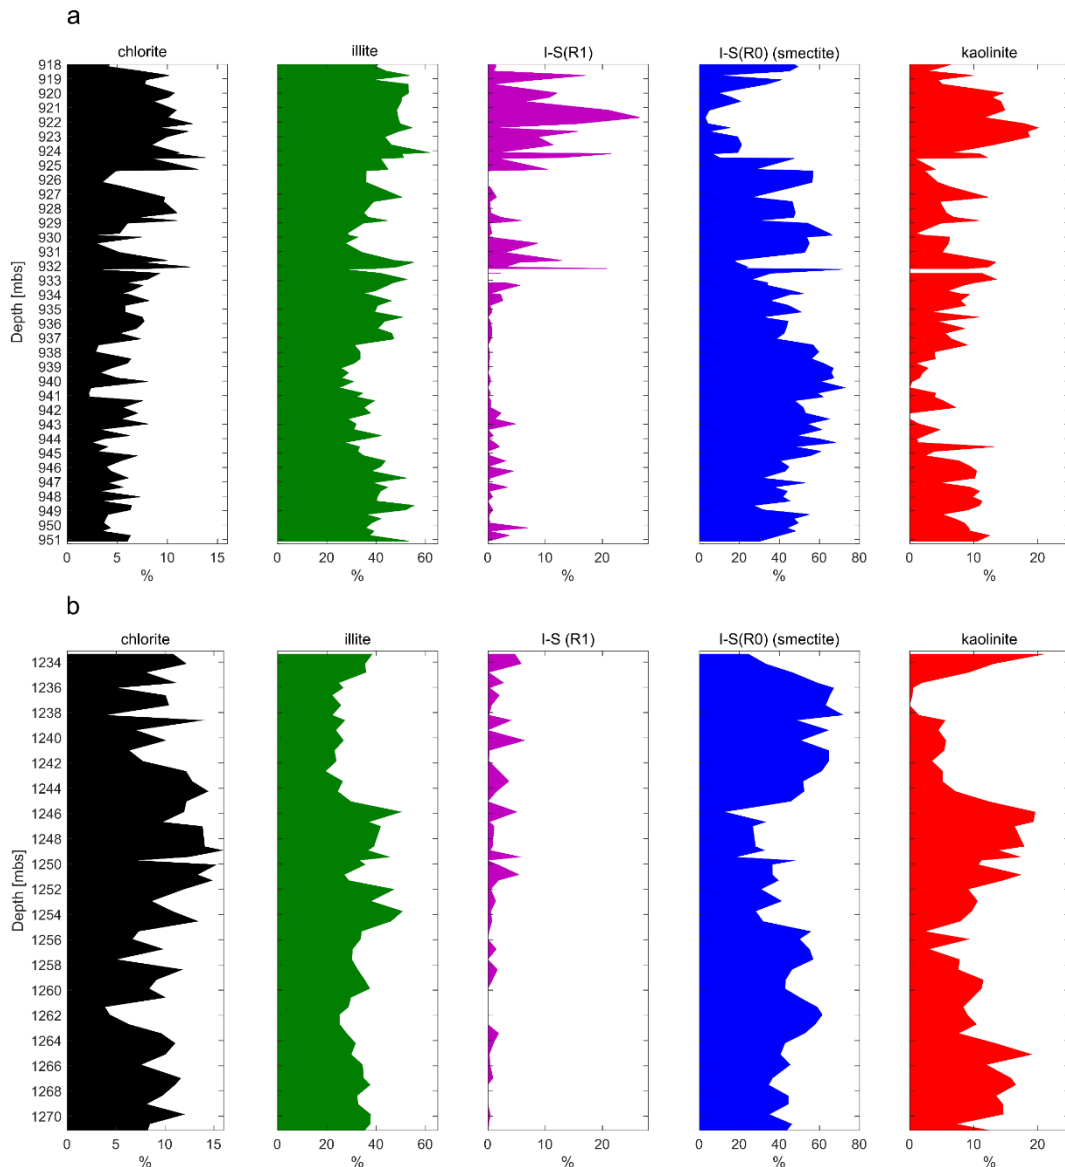

42

43 **SI Fig. 2:** Clay mineralogical abundance from the sediments of the LP and the SPB in the Mochras  
 44 borehole. (a) The proportions of chlorite and illite-smectite mixed layers type R1 increase to the top of  
 45 the record, coeval with illite and kaolinite. A long term opposite trend is observed in the abundance of  
 46 smectite and kaolinite, in which kaolinite and illite co-vary (similar of the longer Pliensbachian clay  
 47 mineralogy record of Mochras published in Deconinck et al. (2019). This indicates a climatic origin of  
 48 the clay minerals (Deconinck et al., 2019) (results published in Hollaar et al. (2021; 2023)). (b) The  
 49 clay mineralogical abundance record of the SPB studied interval. Chlorite is more abundant compared  
 50 to the LP record. Smectite and kaolinite vary in parallel, however, the covariation of illite and  
 51 kaolinite is less clear. I-S R1 type illite-smectite mixed layers are below the level of error detection (5  
 52 %) and are dismissed for interpretation in this record.

53

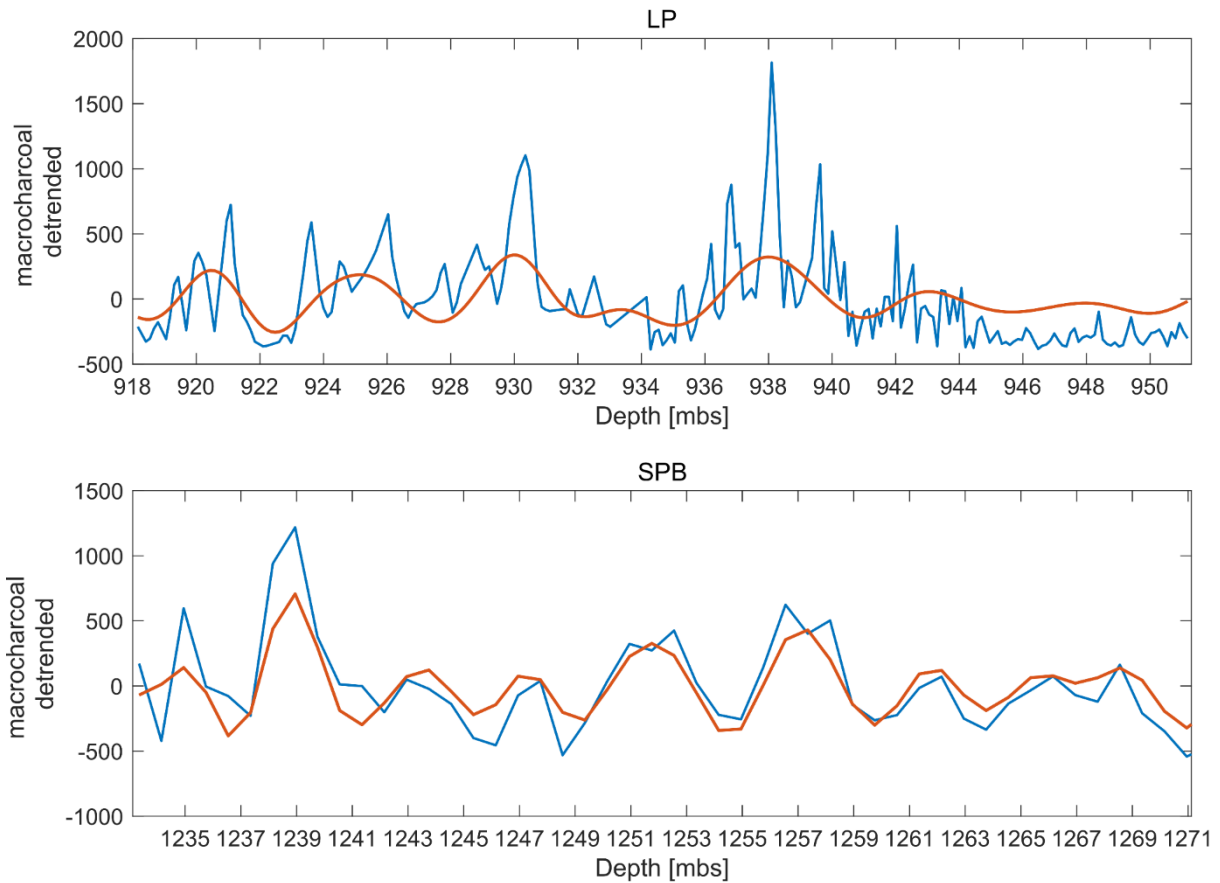

54

55 **SI Fig. 3:** Linear detrended macrocharcoal record and the 10.2 – 3.2 m filter. (a) The linear detrended  
 56 macrocharcoal record of the LP interval in blue. The 10.2 – 3.2 m period is filtered out of the  
 57 macrocharcoal record in Acycle. This broad filter resembles the 100 kyr periodicity in the depth  
 58 domain (Ruhl et al., 2016). The number of peaks corresponds to the number of short eccentricity  
 59 cycles in the studied interval found by Ruhl et al. (2016) and do capture the ~5 m bundles observed in  
 60 the macrocharcoal record. (b) The linear detrended macrocharcoal record of the SPB studied interval  
 61 in blue. The 10.2 – 3.2 m signal is filtered out of this charcoal record and plotted over the detrended  
 62 charcoal record in orange. The individual peaks capture the ~5 m peaks in macrocharcoal observed in  
 63 this record. Also, 9 peaks are observed, which is in agreement with Ruhl et al. (2016) who found 9  
 64 100 kyr eccentricity cycles for this interval.

65

66

67

68

69

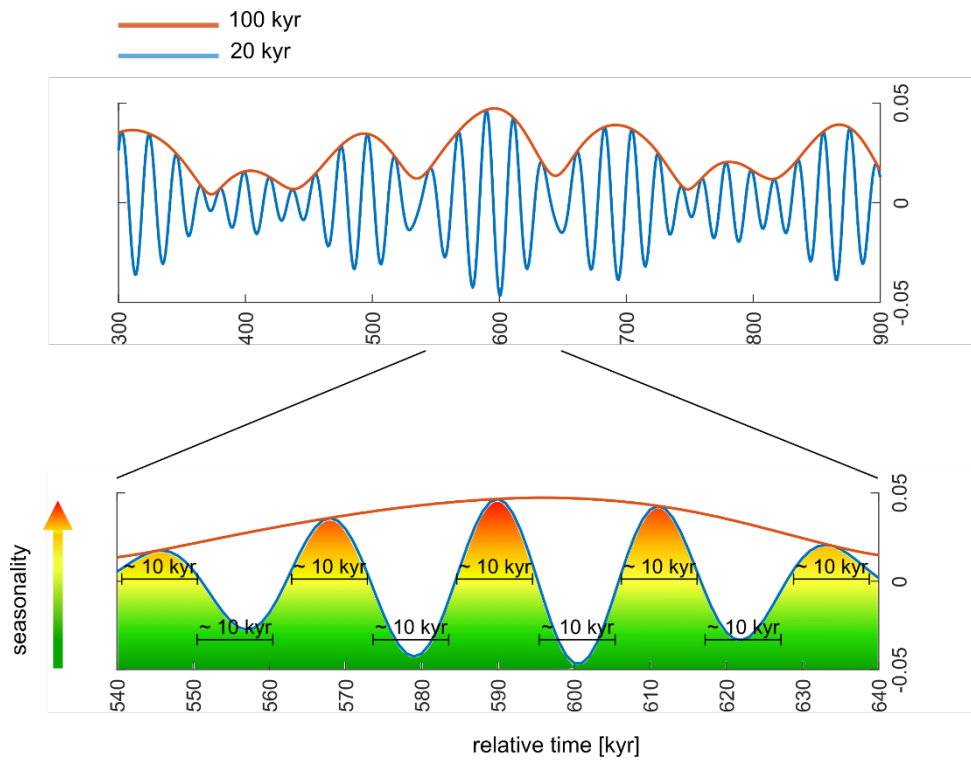

70

71

72 **SI Fig. 4:** Schematic image showing eccentricity modulation of the precession cycle, each precession  
 73 cycle contains ~ 10 kyr of minimum precessional forcing (equitable climate) and ~10 kyr of  
 74 maximum precessional forcing (extreme seasonal contrast). The ~20 kyr precession and ~100 kyr  
 75 eccentricity sine curves are derived from Laskar 2010d plotted in Acycle.

76

77
