# Supplementary material for: The optimum fire window: applying the fire-productivity hypothesis to Jurassic climate states
Source: Copernicus journal article supplement (doi:10.5194/egusphere-2023-2266), 2023-10-10
Supplement: Supplementary file [file egusphere-2023-2266-RC1-supplement.pdf]

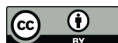

1           The optimum fire window: applying the fire-productivity  
2                                   hypothesis to Jurassic climate states

3  
4

5 Teuntje P. Hollaar\*<sup>1,2</sup>, Claire M. Belcher<sup>1</sup>, Micha Ruhl<sup>3</sup>, Jean-François Deconinck<sup>4</sup>, Stephen P.  
6 Hesselbo<sup>2,5</sup>

7

8 <sup>1</sup>WildFIRE Lab, Global Systems Institute, University of Exeter, Exeter, EX4 4PS, UK

9 <sup>2</sup>Camborne School of Mines, Department of Earth and Environmental Sciences, University of Exeter,  
10 Penryn Campus, Penryn, TR10 9FE, UK

11 <sup>3</sup>Department of Geology, Trinity College Dublin, The University of Dublin, College Green, Dublin,  
12 Ireland

13 <sup>4</sup>Biogéosciences, UMR 6282 CNRS, Université de Bourgogne/Franche-Comté, 21000 Dijon, France

14 <sup>5</sup>Environment and Sustainability Institute, University of Exeter, Penryn Campus, Penryn, TR10 9FE,  
15 UK

16 \*Corresponding author: t.p.hollaar@uu.nl

17

18 **Abstract**

19 Present day fire frequency has been suggested to relate to a productivity/aridity gradient on a regional  
20 and global scale. Optimum fire conditions occur at times of intermediate productivity and aridity,  
21 whereas fire is limited on the high productivity (moisture) and aridity (no fuel) endmembers.  
22 However, the current global fire activity pattern is biased by the predominant burning of grasslands.  
23 Here we test the intermediate fire-productivity hypothesis for a time period on Earth before the  
24 evolution of grasses, the Early Jurassic, and explore the fire regime of two contrasting climatic states:  
25 the Late Pliensbachian (LPE) cooling Event and the Sinemurian – Pliensbachian Boundary (SPB)  
26 warming. Palaeo-fire records are reconstructed from fossil charcoal abundance, and changes in the  
27 hydrological cycle are tracked via clay mineralogy, which allows inference of changes in fuel  
28 moisture status. Large fluctuations in the fossil charcoal on an orbital eccentricity time scale indicate  
29 two modes of fire regime at the time. Wildfires were moisture limited in a high productivity  
30 ecosystem during eccentricity minima for both the SPB and LPE. During eccentricity maxima, fires  
31 increased, and an optimum fire window was reached, in which heightened seasonality led to  
32 intermediate states of productivity and aridity. The LPE experienced more extreme climatic  
33 endmembers compared to the SPB, with the fire regime edging closer to ‘moisture limitation’ during



34 eccentricity minima, and more pronounced seasonality during eccentricity maxima, explained by the  
35 overall cooler climate at the time. This study illustrates that the intermediate-productivity gradient  
36 holds up during two contrasting climatic states in the Jurassic.

37

### 38 **Plain Language Summary**

39 Fires are limited in year-round wet climates (tropical rainforests, too wet), and in year-round dry  
40 climates (deserts, no fuel). This concept, the intermediate-productivity gradient, explains the global  
41 pattern of fire activity. Here we test this concept for climate states of the Jurassic (~190 Myr ago). We  
42 find that the intermediate-productivity gradient also applies in the Jurassic, despite the very different  
43 ecosystem assemblages, with fires most frequent at times of high seasonality.

44

### 45 **Key Points**

- 46 • The intermediate-fire productivity gradient can be applied to the Jurassic and be utilized to  
47 explain shifts in biomass, rainfall and fire.
- 48 • The terrestrial ecosystem surrounding the Cardigan Bay Basin was not year-round dry during  
49 the Sinemurian–Pliensbachian Boundary warming Event or the Late Pliensbachian Cooling  
50 Event and therefore fire was not aridity limited.
- 51 • Fire activity was strongly influenced by the ~100 kyr and 405 kyr eccentricity cycle during  
52 both climatic states, which led to two modes in the fire regime: productivity limited (minima)  
53 and the optimum fire-window (maxima).

54

55

56

57

58

59

60

61

62

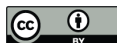

63 **1 Introduction**

64 The global distribution of fire at the present day follows the intermediate-productivity **concept**. This  
65 concept states that fire activity increases non-linearly along a productivity gradient primarily  
66 controlled by biomass and fuel availability (Pausas & Bradstock, 2007; Pausas & Ribeiro, 2013).  
67 Climate drives fuel availability, structure, and moisture, which are the main **ingredients** of the fire  
68 regime. Fire is either limited by high moisture and biomass production, for example in tropical  
69 rainforests, or in high aridity and low biomass production ecosystems, such as deserts. This principle  
70 explains drought-driven fire regimes and fuel-limited fire regimes (Pausas & Ribeiro, 2013). In humid  
71 regions fires are initiated because aridity leads to flammable conditions and lower fuel-moisture  
72 status. In unproductive arid regions it is biomass production that determines fire activity, as the fuel-  
73 moisture status would not be limiting (Pausas & Ribeiro, 2013). The optimum window for wildfires is  
74 at intermediate productivity levels, such as tropical savannahs, wherein biomass can accumulate due  
75 to seasonal precipitation and fuel becomes available in the dry season when the fuel moisture status  
76 lowers (Meyn et al., 2007; Pausas & Bradstock, 2007; Krawchuk & Moritz, 2011; Pausas & Paula,  
77 2012; Pausas & Ribeiro, 2013).

79 The intermediate-productivity concept provides an effective explanation for the distribution of fire on  
80 a global and regional scale where highest fire activity is found at intermediate moisture availability  
81 (Meyn et al., 2007; Krawchuk & Moritz, 2011; Daniau et al., 2012). However, the observation of high  
82 fire activity in ecosystems that are of intermediate aridity and productivity is strongly driven by grass  
83 biomes (Archibald et al., 2018). In the present day, >80 % of area burnt is grasslands (van der Werf et  
84 al., 2006), thus this vegetation group clearly biases these generalisations (Archibald et al., 2018).  
85 Since fire has formed an important part of ecosystems and the Earth system since 420 Ma (Glasspool  
86 et al., 2004; Glasspool & Gastaldo, 2022), we therefore ask how long the intermediate-productivity  
87 gradient has existed and if the concept also applied in a world before the evolution of grasses.

89 Here we look back at two contrasting climate events in the Early Jurassic, ~190 Myr ago, to assess  
90 what evidence there is for the existence of the intermediate-productivity fire gradient at such time  
91 (Fig. 1). The first event, the Sinemurian-Pliensbachian Boundary event (SPB, is marked by global  
92 warming, sea-level rise, increased humidity, and a negative carbon-isotope excursion (Ruhl et al.,  
93 2016; Haq, 2018; Deconinck et al., 2019; Storm et al., 2020). In contrast, the second event, the late  
94 Pliensbachian Event (LPE) is marked by ~5 °C cooling in NW Europe, greater aridity, sea-level fall  
95 and a global positive carbon-isotope excursion (e.g. Korte et al., 2015; Ruhl et al., 2016; Haq, 2018;  
96 Deconinck et al., 2019; Storm et al., 2020). We couple charcoal, clay and climate data to infer palaeo-  
97 fire and the hydrological regimes during both these time intervals.

98



99 2 Materials and Methods

100 Materials

101 The records from both time periods are taken from the Llanbedr (Mochras Farm) borehole, from  
 102 sedimentary strata deposited in a relatively deep marine setting close to the shore in the Cardigan Bay  
 103 Basin (Wales, UK). These sediments show a strong regular orbital control in the limestone-mudstone  
 104 alternations (Ruhl et al., 2016), and an existing astrochronological framework allows for time  
 105 constraints. In addition, input of terrestrial organic matter input in the sampled section is relatively  
 106 high (van de Schootbrugge et al., 2005; Riding et al., 2013), and thus provides ideal material to study  
 107 palaeo-fire regimes with a high temporal constraint.

108

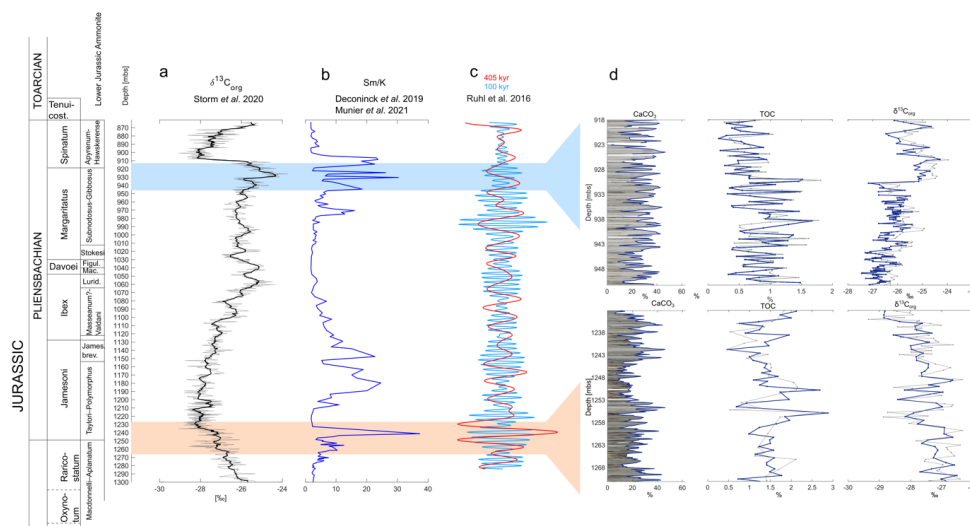

109 **Fig. 1:** Cyclostratigraphic framework of the latest Sinemurian–Pliensbachian of the Mochras core  
 110 and the two intervals here studied. Red bar represents the interval (1271–1233 mbs) of the SPB  
 111 and the blue bar represents the interval of the LPE (951–918 mbs) (a) The  $\delta^{13}C_{org}$  record from the  
 112 Mochras core (Storm et al., 2020), shows the broad negative carbon-isotope trend around the SPB  
 113 and the positive carbon-isotope excursion (CIE) in the Late Pliensbachian. (b) The smectite/kaolinite  
 114 (Sm/K) ratio reflects changes in the hydrological cycle; data from Deconinck et al. (2019) and Munier  
 115 et al. (2021). Peaks in smectite indicate greater climatic aridity (Deconinck et al., 2019; Munier et al.,  
 116 2021). (c) Orbital filters of the 100 kyr and 405 kyr cycle based on the Ca and Ti elemental records in  
 117 the depth domain from Ruhl et al. (2016). (d) The LPE interval is carbonate-rich and shows the  
 118 metre-scale variations in  $CaCO_3$  and TOC, next to the  $\delta^{13}C_{org}$  positive shifts that marks the onset of  
 119 the LPE. (e) The SPB interval contains relatively more clay and lithological couplets of alternating  
 120  $CaCO_3$  and TOC-enhanced beds occurring on a metre scale. The  $\delta^{13}C_{org}$  shows the negative trend of  
 121 the long-negative limb of the SPB negative CIE.



122 The Mochras core was drilled between 1967 and 1969 on the coast in NW Wales, UK. Preserved 1-m-  
123 length core slabs of the core are stored at the British Geological Survey National Core Repository at  
124 Keyworth, United Kingdom. The Pliensbachian of Mochras shows alternating beds of pale grey  
125 limestone and dark brown to grey mudstone (Ruhl et al., 2016). These couplets occur throughout the  
126 Pliensbachian, but vary in thickness, from about 90 cm at the Sinemurian–Pliensbachian boundary to  
127 about 30 cm in the Late Pliensbachian age strata (latest Margaritatus and Spinatum zones) (Ruhl et al.,  
128 2016). The lithological couplets are well expressed around the SPB and in the Margaritatus Zone  
129 (Ruhl et al., 2016). For this study, samples were taken at an average sample spacing of 90 cm across  
130 the **Sinemurian–Pliensbachian boundary** (1272–1233 mbs (metres below surface)). In addition, data  
131 are utilized in this study that are published in Hollaar et al. (2021; 2023), from the **Late Pliensbachian**  
132 **interval** that is sampled at a 10 cm (951–934 mbs) and 30 cm (934–918 mbs) resolutions. The  
133 macrocharcoal data between 934–918 mbs are new and not previously published.

#### 134 *Palaeolocation*

135 During the Early Jurassic, the Mochras site was situated in the Boreal realm of the Laurasian Seaway,  
136 which contained an island archipelago, and covers most of present-day NW and W Europe. The  
137 Mochras site was situated at a palaeolatitude of ~ 35° N (Torsvik & Cocks, 2017), just off the Welsh  
138 Massif, in a relatively deep marine setting, below storm base (Pieńkowski et al., 2021), but with a  
139 strong terrestrial influence (van de Schootbrugge et al., 2005; Riding et al., 2013; Xu et al., 2018;  
140 Storm et al., 2020).

#### 141 *Methods*

##### 142 Mass spectrometry $\delta^{13}\text{C}_{\text{org}}$ , TOC and $\text{CaCO}_3$

143 Bulk organic carbon-isotopes, TOC and carbonate content were measured to track changes in the  
144 carbon-cycle and changes in total organic matter in the studied interval. For the SPB interval (1271–  
145 1233 mbs) 50 samples and for the LPE (934–918 mbs) 43 samples were processed for carbon isotope  
146 mass spectrometry. Bulk rock samples were powdered using a pestle-a-mortar, weighed into  
147 centrifuge tubes, and decarbonated using 3.3 % HCl. Following, the samples were transferred to a hot  
148 bath (79 °C) for 1 h to remove siderite and dolomite. After this, the samples were centrifuged and the  
149 liquid decanted, this step repeated until the samples were neutralized (on average 2 times). Finally, the  
150 samples were oven-dried, re-powdered, and weighed (to measure  $\text{CaCO}_3$  loss) and transferred into  
151 small tin capsules for mass spectrometry (TOC and  $\delta^{13}\text{C}_{\text{org}}$ ), at the University of Exeter, Penryn  
152 Campus.

##### 153 Charcoal quantification and palynofacies

154 For the SPB interval, 54 samples were prepared for charcoal analysis and 42 for palynofacies at the  
155 University of Exeter, Streatham Campus. For the LPE interval, an additional 50 macrocharcoal  
156 samples were analysed, to compliment a total of 204 macrocharcoal samples for this interval. A total



157 of 162 samples for palynofacies and 200 microcharcoal samples are included in the LPE study  
158 interval.

159 Rock samples of 10–30 g weight were split into 0.5 cm<sup>3</sup> fragments to minimize the breakage of the  
160 organic particles whilst optimizing the surface area for palynological acid maceration. First, the 190  
161 samples were treated with 10 % and 37 % HCl to remove carbonate. After this, hydrofluoric acid (40  
162 % HF) was added to remove silicates from the sample. The samples were left to digest for 48 h, after  
163 which cold concentrated HCl (37 %) was added to avoid calcium fluoride precipitation. Each sample  
164 was left to settle, after which it could be decanted and topped up with DI water, a step that was  
165 repeated ~ 6 times in order for the sample to neutralize.

166 After neutralizing, 5 droplets of the mixed residue were taken for the analysis of palynofacies (total  
167 particulate organic matter) prior to any sieving. The remaining residue was sieved through a 125 µm  
168 sieve and a 10 µm sieve to retrieve the macroscopic fraction (> 125 µm) and microscopic fraction  
169 (10–125 µm). Macroscopic charcoal (>125 µm) was quantified using a Zeiss Stemi microscope, with  
170 a 10 x 4 magnification lens and top lighting from a ‘goose necked’ light source. The entire  
171 macroscopic fraction was dispersed in a Petri dish filled with DI water and the number of charcoal  
172 particles counted and expressed per 10 g of processed rock (n/g). In some samples large clusters of  
173 matrix were not digested by the acid, in which case they were taken out and dry weighed to deduce  
174 the weight of the total processed rock.

175 Microscopic charcoal (10–125 µm) was analysed on a palynological slide. A known quantity of 125  
176 µl of the microscopic fraction was mounted onto microscopic slides using glycerine jelly. A  
177 transmitted light microscope (Olympus (BX53)) with a 40 x 10 magnification was used to count the  
178 charcoal particles. Four transects per slide were counted, one transect on the left, two in the middle,  
179 and one on the right of the coverslip. These data were then scaled up to the known quantity of the total  
180 sample (Belcher et al., 2005). Palynofacies were examined to record shifts in the type of organic  
181 matter (terrestrial vs marine) and potential changes in organic matter preservation and/or terrestrial  
182 runoff. Palynofacies were quantified using the optical light microscope and a minimum of 300 organic  
183 particles per palynological slide was counted. The types of organic matter were roughly grouped after  
184 Oboh-Ikuenobe et al. (2005): terrestrial palynomorphs (spores and pollen), marine palynomorphs  
185 (dinoflagellates, acritarchs, prasinophytes and foraminifera test linings), fungal remains, structured  
186 phytoclasts (wood particles, parenchyma), unstructured phytoclasts (degraded plant remains),  
187 charcoal, black debris (palynomorphs filled with pyrite) and amorphous organic matter (AOM: fluffy,  
188 clotted and granular masses, colour ranging between almost colourless to yellow and pale brown).

#### 189 XRD clay mineralogy

190 A total of 55 samples were prepared for clay mineralogy spanning the SPB interval. About 5 g of  
191 bulk-rock sample was gently crushed and powdered with an agate mortar, after which about 2–3 g of



192 the powdered sample was decarbonated with a 0.2 M HCl solution. The samples were left to settle for  
193 95 min, after which the suspended clay sized fraction ( $< 2 \mu\text{m}$ ) was extracted with a syringe following  
194 Stokes law. The clay fraction was centrifuged and subsequently smeared and oriented on glass slides.  
195 The samples were analysed by X-ray diffraction (XRD) using a Bruker D4 Endeavour diffractometer  
196 (Bruker, Billerica, MA, USA) with Cu K $\alpha$  radiations, LynxEye detector and Ni filter under 40 kV  
197 voltage and 25 mA intensity at the Biogéosciences Laboratory, Université Bourgogne/FrancheComté,  
198 Dijon. Three runs were performed per sample to discriminate the clay phases: (1) air-drying at room  
199 temperature; (2) ethylene-glycol solvation for 24 h; (3) heating at 490 °C for 2 h, following Moore &  
200 Reynolds (1997). Comparing the three diffractograms obtained, the clay minerals were identified  
201 using their main diffraction (d0001) peak. The proportions of each clay mineral on glycolated  
202 diffractograms was estimated with the MACDIFF 4.2.5 software (Petschick, 2000). The identification  
203 of the clay minerals further follows the methods in Moore & Reynolds (1997) and Deconinck et al.  
204 (2019).

#### 205 Orbital filters and the charcoal record

206 The Pliensbachian of the Mochras core has a well-established astrochronological framework (Ruhl et  
207 al., 2016; Hinnov et al., 2018; Storm et al., 2020; Hollaar et al., 2021; Pienkowski et al., 2021). Based  
208 on the existing cyclostratigraphy, the 100 kyr eccentricity cycle lies within the range of 3.2–10.2 m  
209 (Ruhl et al., 2016; Hinnov et al., 2018), 6.3–4.8 m (Storm et al., 2020), and ~5.3 m (Pienkowski et al.,  
210 2021) for the studied intervals. The here studied intervals of the SPB and LPE comprise ~8–9 short  
211 eccentricity cycles. No spectral analysis has been performed on the records presented here because of  
212 the limited time span represented. Instead, we compare the charcoal and clay records visually with the  
213 100 kyr and 405 kyr filters based on Ca and Ti (Ruhl et al., 2016; Hinnov et al., 2018).

214

### 215 **3 Results**

216 The data presented here that cover the run-up to and onset of the SPB (1271–1233 mbs) show a ~1.8  
217 ‰ negative shift in  $\delta^{13}\text{C}_{\text{org}}$  spanning the end of the negative CIE limb in the Mochras borehole and  
218 reaching most negative values. The results of the LPE interval which encompass the run-up and onset  
219 of the LPE (951 – 918 mbs), show a rapid positive shift in the  $\delta^{13}\text{C}_{\text{org}}$  of ~1.8 ‰ (between 930.8 –  
220 930.4 mbs) (in agreement with Storm et al., 2020).

221 Large fluctuations are observed in the abundance of both macroscopic ( $>125 \mu\text{m}$ ) and microscopic  
222 (10–125  $\mu\text{m}$ ) fossil charcoal for both CIEs. For the SPB, microcharcoal abundance fluctuates from  
223  $2 \times 10^4$ – $4.2 \times 10^5$  (mean  $2 \times 10^5$ ) particles per 10 g of sediment, and the number of macrocharcoal  
224 particles varies from 99–2327 (mean 787) particles per 10 g sediment (Fig. 2). A similar trend is  
225 observed in both size fractions, with individual charcoal peaks fluctuating on a 2–4 m scale (Fig. 2).  
226 In the higher resolution LPE interval, metre-scale individual peaks of charcoal abundance are



227 observed, with microcharcoal abundance fluctuating from  $4.5 \times 10^3$ – $4.3 \times 10^5$  (mean  $1.1 \times 10^5$ ) particles  
 228 per 10 g of sediment, and the number of macrocharcoal particles varies from 8–2276 (mean 376)  
 229 particles per 10 g sediment (Fig. 3). Longer term fluctuations in the macrocharcoal record are also  
 230 observed, with bundling of peaks visible every ~4–5 m. Micro- and macro-charcoal are more  
 231 abundant in the SPB compared to the LPE (Fig. 4).  
 232

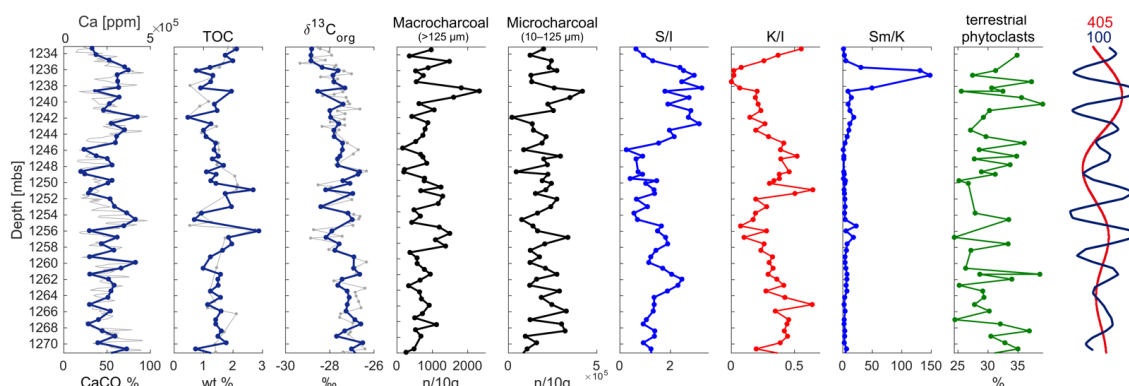

233 **Fig. 2: The SPB studied interval showing all proxies of this study in context of the orbital filters**  
 234 **(Ruhl et al., 2016).** The  $\text{CaCO}_3$ , TOC and  $\delta^{13}\text{C}_{\text{org}}$  (blue) data obtained for the present study are  
 235 plotted over previously published data (light grey – Ruhl et al., 2016; Storm et al., 2020). The  
 236 macrocharcoal abundance shows ~5 peaks throughout the studied interval. The majority of  
 237 macrocharcoal peaks are mirrored in the microcharcoal fraction. Alternating phases of increase in the  
 238 smectite/illite ratio (S/I) and the kaolinite/illite ratio (K/I) indicate swings in the hydrological cycle.  
 239 This is further indicated by the smectite/kaolinite ratio (Sm/K). The percentage of terrestrial  
 240 phytoclasts shows that the terrestrially sourced organic particles fluctuate around 30% in the studied  
 241 interval. Finally, the orbital filters of Ruhl et al. (2016) indicate that the clay records shift dominance  
 242 on a 405 kyr time scale. The peaks in the macrocharcoal record occur on a 100 kyr time scale.



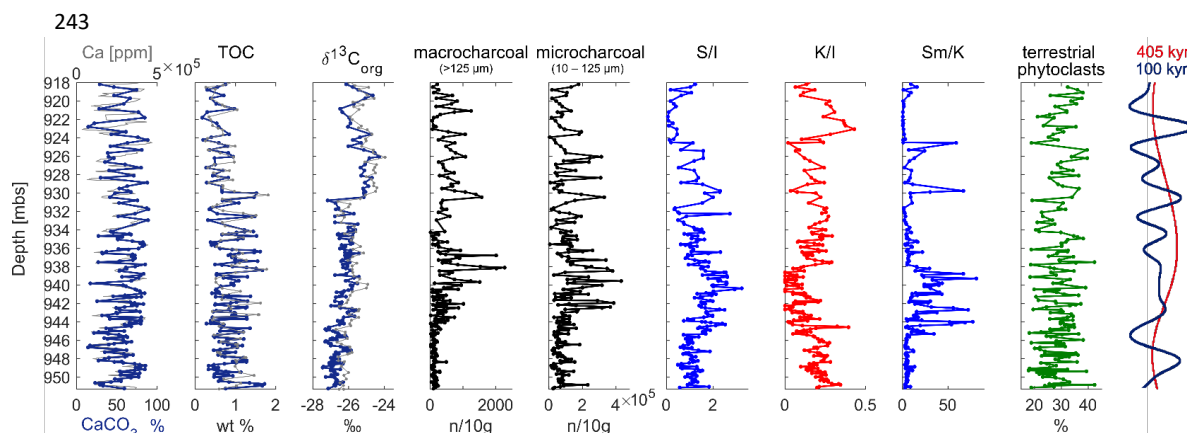

244 **Fig. 3: Synthesis of the LPE interval showing all proxies considered in this study in context of the**  
 245 **orbital filters (Ruhl et al., 2016).** The  $\text{CaCO}_3$ , TOC and  $\delta^{13}\text{C}_{\text{org}}$  (blue) from Hollaar et al. (2023) are  
 246 plotted over independently generated data (light grey - Ruhl et al., 2016; Storm et al., 2020). The  
 247 macrocharcoal abundance shows ~5 peaks throughout the studied interval. The majority of  
 248 macrocharcoal peaks are mirrored in the microcharcoal fraction. Alternating phases of increase in the  
 249 smectite/illite ratio (S/I) and the kaolinite/illite ratio (K/I) indicate swings in the hydrological cycle.  
 250 This is further indicated by the smectite/kaolinite ratio (Sm/K). The percentage of terrestrial  
 251 phytoclasts shows that the terrestrially sourced organic particles fluctuate around 30 % in the studied  
 252 interval. Finally, the orbital filters of Ruhl et al. (2016) are placed next to the proxy records. This  
 253 shows that the clay records shift dominance on a 405 kyr time scale. The peaks in the macrocharcoal  
 254 record occur on a 100 kyr time scale.

255

256 The palynofacies of both intervals is typically marine (AOM>58%). The proportion of terrestrial vs  
 257 marine organic matter remains relatively stable through both the SPB and LPE, varying between 24.4  
 258 and 39.1% (mean 30.7%), and 17.7 and 42.3% (mean 28.9%), respectively. Charcoal accounts for  
 259 ~3.7% and ~4.5% of the total particulate organic matter, respectively for the SPB and the LPE  
 260 intervals (SI Fig. 1). The abundance of macrocharcoal is not influenced by the percentage of terrestrial  
 261 particulate organic matter through the SPB and LPE intervals (SPB  $r = -0.12$ ,  $p = 0.42$ ; LPE  $r = 0.06$ ,  
 262  $p = 0.46$ ) and nor is the microcharcoal abundance for the SPB interval ( $r = 0.07$ ,  $p = 0.62$ ). However, a  
 263 very weak correlation exists between the percentage of terrestrial phytoclasts and microcharcoal  
 264 abundance in the LPE interval ( $r = 0.16$ ,  $p = 0.05$ ). These results suggest that the preservation and/or  
 265 influx of terrestrial particulate organic matter is not the main driver of fluctuations in charcoal  
 266 abundance.

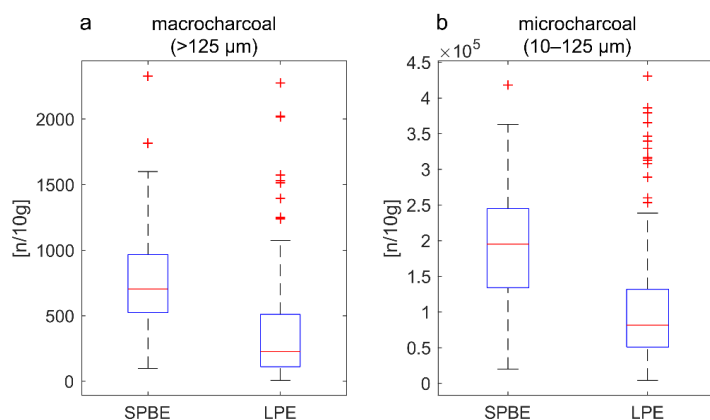

267

268 **Fig. 4:** Distribution boxplots of the macrocharcoal and microcharcoal abundance of the SPB and  
 269 LPE studied intervals. (a) Average macrocharcoal abundance is higher in the SPB interval compared  
 270 to the LPE interval, however, the absolute minimum and maximum are similar. (b) Average  
 271 microcharcoal abundance is higher for the SPB compared to the LPE. The minimum number of  
 272 microcharcoal particles is lower for the LPE, however, the maximum microcharcoal abundance is  
 273 similar in both records.

274

275 The clay mineral assemblages of the SPB and LPE are dominated by illite, kaolinite and smectite (I-S  
 276 R0), with smectite increasing in parallel with decreases of illite and kaolinite (SI Fig. 2). Low  
 277 proportions of chlorite and sparse I-S R1 are present in the SPB record. Chlorite and I-S R1 are  
 278 generally low in the LPE record but increase between 924–219 mbs (SI Fig. 2). Two smectite-  
 279 enhanced phases occur for the SPB, at 1264–1255 mbs and 1245–1235 mbs. Both these phases are  
 280 coeval with high charcoal abundance (both size fractions) (Fig. 2). Additionally, the LPE interval  
 281 encompasses two stratigraphic intervals rich in smectite; from 944–937 mbs and 931–924 mbs.  
 282 Charcoal abundance (both size fractions) increases overall, and coevally with the S/I, over ~ 5 m scale  
 283 fluctuations, and decreases at levels with high K/I (Fig. 3). The 3.2–10.2 m orbital filter of the  
 284 macrocharcoal records (interpreted as the 100 kyr eccentricity (Ruhl et al., 2016; Hinnov et al., 2018;  
 285 Storm et al., 2020; Pienkowski et al., 2021)), indicates that the observed fluctuations in the  
 286 macrocharcoal record occur with a 100 kyr periodicity (SI Fig. 6).

287

## 288 4 Discussion

### 289 Charcoal transport and preservation

290 The charcoal records for both the SPB and LPE intervals do not appear to be linked to the terrestrial



291 influx of materials, as evidenced by the palynofacies. No parallel trends are observed between the  
292 abundance of terrestrial phytoclasts and the number of charcoal particles, which suggests that the  
293 abundance of charcoal is not a reflection of preservation and/or runoff changes. Inferred sea level  
294 changes during the LPE and the SPB could potentially have impacted the charcoal abundance record  
295 and the clay mineralogy. Transgression and relative sea-level rise during the SPB has been extensively  
296 recorded from the Boreal and Tethys regions, and from South America (e.g. Legarreta and Uliana,  
297 1996; de Graciansky et al., 1998; Hesselbo & Jenkyns, 1998; Danisch et al., 2019; Silva et al., 2021).  
298 The Late Pliensbachian is characterized by widespread regressive facies and inferred relative sea-level  
299 fall, likely indicating a closer proximity to shore also in the Mochras borehole. Fossil wood in the  
300 Mochras borehole has been shown to become more abundant at this time, suggesting a potential bias  
301 of higher terrestrial input from a nearby landmass (Ullmann et al., 2022). However, the mean  
302 abundance of macrocharcoal and microcharcoal is higher during the SPB (mean of 787 and  $2 \times 10^5$   
303 respectively) compared to the LPE (mean of 376 and  $1.1 \times 10^5$  respectively) in the Mochras borehole,  
304 suggesting that the shore proximity did not impact overall charcoal abundance. Similarly, the  
305 palynofacies analysis indicates that the mean abundance of terrestrial particulate organic matter during  
306 the SPB (30.7%) is not higher compared to the LPE (28.9%). Hence, we take this as strong evidence  
307 that the record of fossil charcoal records changes in wildfire activity.

#### 308 *Orbital forcing of the hydrological cycle and fire*

309 Alternations in the dominance of smectite and kaolinite occur approximately every 10 m in both the  
310 LPE and SPB records. Kaolinite and smectite reflect hydrological changes in the palaeoenvironment  
311 of the Cardigan Bay Basin (Deconinck et al., 2019; Munier et al., 2021). As the smectite and kaolinite  
312 clay minerals are detrital in character and their abundance varies in opposition to one another (Fig. 2  
313 and 3), these clays are likely derived from pedogenic weathering profiles (Deconinck et al., 2019).  
314 Smectite preferentially forms under a hot and seasonally arid climate, similar to a monsoonal climate  
315 system or the winter-wet climate of the Mediterranean zone (Chamley, 1989; Deconinck et al., 2019).  
316 Kaolinite is indicative of an accelerated hydrological cycle, increased runoff and a year-round wet  
317 climate (Chamley, 1989; Ruffell et al., 2002) either via formation in strong weathering profiles or via  
318 the physical erosion of kaolinite-bearing rocks (Chamley, 1989). At times of high smectite abundance,  
319 fire activity is greatest as observed from the macro- and micro-scopic charcoal fractions (Fig. 2 and  
320 3). Based on the astrochronological framework of the Mochras borehole (Ruhl et al., 2016; Hinnov et  
321 al., 2018; Storm et al., 2020; Pieńkowski et al., 2021) these alternations appear to occur in concert  
322 with the 405 kyr long-eccentricity cycles (Fig. 2, Fig. 3). Eccentricity modulates the precession driven  
323 changes in seasonal and latitudinal distribution of insolation (Imbrie & Imbrie, 1980; Berger et al.,  
324 1989). One ~20 kyr precession cycle can represent a strongly seasonal extreme climate for ~10 kyr  
325 and a weakly seasonal climate for the subsequent ~10 kyr. The geological record averages the



326 amplification or suppression of seasonality between years (SI Fig. 4). Eccentricity forcing modulates  
327 the amplitudes of these extremes in seasonality with periodicities of 100 kyr and 405 kyr.

328 In the Mesozoic, eccentricity maxima are commonly associated with dry climates that are disrupted  
329 by short and intense periods of precipitation and storm activity in the boreal landmasses bordering the  
330 NW Tethys (Martinez & Dera, 2015). In contrast, eccentricity minima are characterized by a more  
331 moderate seasonal contrasts and year-round wet conditions (Martinez & Dera, 2015). Eccentricity  
332 minima are linked to periods of enhanced runoff and weathering conditions as evidenced by high  
333 kaolinite content,  $^{87}\text{Sr}/^{86}\text{Sr}$ , and negative shifts in  $\delta^{18}\text{O}$  (Martinez & Dera, 2015). Therefore, we link  
334 the observed smectite-rich intervals to eccentricity maxima and the kaolinite-rich intervals to  
335 eccentricity minima. Charcoal abundance is highest during the seasonal climate of the eccentricity  
336 maxima for the SPB, in agreement with the previous findings for the LPE (Hollaar et al., 2021, 2023).

337 Both the LPE and SPB study intervals span two 405-kyr cycles (Ruhl et al., 2016; Hinnov et al., 2018;  
338 Storm et al., 2020; Pieńkowski et al., 2021). The relative abundance of smectite and the abundance of  
339 charcoal both reach a peak during the maxima in the long eccentricity cycle, supporting the notion  
340 that orbitally driven changes in seasonal contrast led to high fire activity. Within these long-term  
341 trends, the macrocharcoal record also shows ~ 5 m scale individual peaks or clusters in both the LPE  
342 and SPB records (SI Fig. 3, Fig. 2 and 3). Based on the existing age model (Ruhl et al., 2016; Hinnov  
343 et al., 2018; Storm et al., 2020; Pieńkowski et al., 2021) we derive that this is the expression of the  
344 ~100 kyr eccentricity cycle in the macrocharcoal record. The orbital filter representing the ~100 kyr  
345 cycle in the Pliensbachian of the Mochras core, captures the observed ~5 m oscillations in the fire  
346 record (SI Fig. 3, Fig. 2 and 3) (Ruhl et al., 2016; Hinnov et al., 2018; Storm et al., 2020; Pieńkowski  
347 et al., 2021).

348 The Sinemurian–Pliensbachian transition is generally associated with an overall warm and humid  
349 climate (Korte & Hesselbo, 2011; Gómez et al., 2016), and enhanced levels of runoff and weathering  
350 (Bougeault et al., 2017). The results presented here suggest that within this overall warm and humid  
351 background, orbital forcing created year-round wet periods, that were not conducive to frequent fire,  
352 alternating with periods that remained warm but had a more seasonal climate, that allowed ignition  
353 during the dry season. In contrast, the LPE, and the sediments of late Margaritatus ammonite  
354 chronozone formed in an overall semi-arid climate with proposed lower runoff levels from the land  
355 into the sea (Deconinck et al., 2019; Hollaar et al., 2021; 2023). During the run-up of the LPE we  
356 infer orbitally forced alternating climatic states of more extreme seasonality (high fire and smectite)  
357 and a more equitable year-round wet climate (low fire and high kaolinite) (Hollaar et al., 2021; 2023)  
358 acting within this overall semi-arid climate phase. Overall, kaolinite fluctuates in abundance in  
359 opposition to smectite, reflecting hydrological changes from wet and hot to semi-arid and hot, in

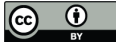

360 agreement with high fire activity during a seasonal climate and fire suppression during a year-round  
361 wet climate for both the LPE and the SPB.

362 *Vegetation, fire and the intermediate fire-productivity gradient*

363 Fuel (vegetation biomass) and moisture status of the fuel, as governed by seasonal patterns in  
364 precipitation and temperature, are major factors influencing fire regime and fire behaviour (Archibald  
365 et al., 2009; Cochrane & Ryan, 2009; Bradstock, 2010; Archibald et al., 2013; Bowman et al., 2014;  
366 Archibald et al., 2018). Ecosystems with low wildfire activity are generally associated with either  
367 high precipitation and abundant primary productivity, or low productivity under strongly arid  
368 conditions (Pausas & Paula, 2012). In contrast, high wildfire activity occurs in climates that are in the  
369 middle of the productivity gradient, where biomass builds up enough to form a connected fuel  
370 structure, and a period of drought allows the fuel to lose moisture content, which allows fire ignition  
371 and more rapid spread (Pausas & Paula, 2012). The observed alternating modes of high and low fire  
372 activity, as inferred from the lower Jurassic fossil charcoal record, during the onset of the SPB and  
373 LPE, likely indicates shifts in seasonality of the Cardigan Bay Basin hinterland and would place both  
374 the LPE and the SPB at intermediate productivity levels during maximum eccentricity forcing. The  
375 intermediate fire-productivity hypothesis (Pausas & Bradstock, 2007; Pausas & Ribeiro, 2013)  
376 conceptualizes this relationship between climate-vegetation-fire, where fire activity is plotted along an  
377 aridity and productivity gradient. On the one extreme, in warm and wet climates fuel is abundant and  
378 the fuel structure has a high degree of connectivity, but the high fuel moisture levels limit fire activity  
379 (Fig. 5). In contrast, in an arid region, fuel would be sparse and fuel connectivity would be poor  
380 limiting fire activity. Although the fuel moisture levels are low and make the fuel that is present  
381 flammable, fire is unable to easily spread. Additionally, there is a higher sensitivity to fuel moisture  
382 levels in the tropical or mesic areas, where a small fall in fuel moisture content can lead to more  
383 flammable conditions (Cochrane, 2003). The deep time combined fire and hydrological records we  
384 present here are in agreement with the intermediate productivity hypothesis of Pausas & Bradstock  
385 (2007), even with very different vegetation assemblages, e.g., a world without grasses. We suggest  
386 that both the LPE and the SPB switched between a state of low fire (either limited by climatic aridity  
387 or the presence and presence and connectivity of fuel) and a state of high fire during which seasonal  
388 contrast is high and an ideal ‘fire window’ exists in which biomass built up during the wet season  
389 after which a fire-prone season followed (Fig. 5).



390

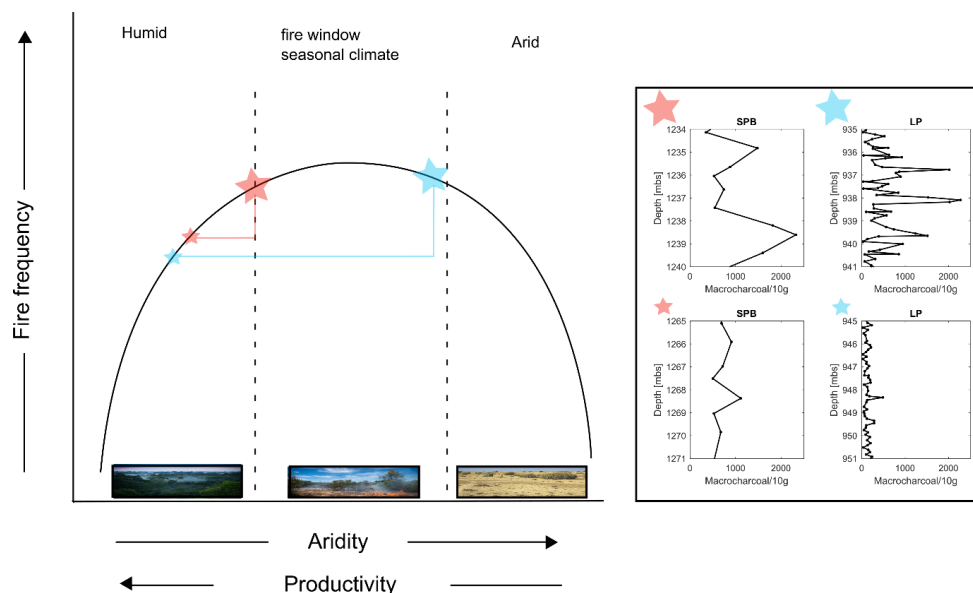

391 **Fig. 5: The LPE and SPB fire records placed on the intermediate productivity gradient.** The graph  
 392 is adapted from Pausas & Bradstock (2007). Fire frequency is highest in the middle of the hyperbole,  
 393 medium levels of aridity and productivity created a seasonal climate in which seasonal biomass  
 394 growth was possible (productivity) and seasonally the fuel moisture limits were lower in a season of  
 395 drought (aridity), this created the optimized 'fire window'. The SPB is plotted on this fire-productivity  
 396 gradient in red: the small star indicates the eccentricity minimum state and the large star the  
 397 eccentricity maximum state. The LPE is plotted on the fire-productivity gradient in blue, and again the  
 398 small star indicates the eccentricity minimum and the large star the eccentricity maximum. The LPE  
 399 has a larger range compared to the SPB, and experienced more fire suppression due to high humidity  
 400 levels during eccentricity minima, and also was closer to a productivity limitation state during the  
 401 eccentricity maximum.

402

403 Hence, in the more highly productive ecosystems fire activity is forced by the frequency of dry  
 404 weather/flammable conditions (Pausas & Paula, 2012). Low fire activity in the Lower Jurassic section  
 405 studied here is found to occur at times of high kaolinite/illite ratios, which indicates an enhanced  
 406 hydrological cycle, and likely a year-round wet climate.

407 We propose that the overall humid climate of the SPB fits the high productivity scenario, in which the  
 408 frequency of flammable conditions is the main factor controlling fire occurrences. Vegetation growth  
 409 likely occurred year-round in this warm and wet climate. No evidence was found to place the SPB on  
 410 the productivity-limiting high-aridity side of the fire gradient spectrum, where fire frequency would



411 have been mainly influenced by enhanced rainfall in an otherwise dry climate that would have  
412 enabled biomass growth and fuel connectivity. These findings are in line with the presence of plant  
413 cuticle through the studied interval, indicating the presence of vegetation during high and low modes  
414 of fire activity. Hence, the SPB seems to conform to the humid and high productivity end of the  
415 aridity gradient (Fig. 5 red lines). Within these constraints (Fig. 5) exists two states for the SPB; the  
416 wetter end of the spectrum occurred during eccentricity minima (Fig. 5), and during eccentricity  
417 maxima on each precession half-cycle conditions enter the seasonal side of the fire-productivity  
418 gradient (towards aridity) to allow an increase in fire activity.

419 The fluctuations occurred over both long-eccentricity and short eccentricity timescales in the  
420 macrocharcoal record showing longer phases of overall enhancement of fire (long-eccentricity) and  
421 relatively abrupt shifts from low to high fire and back again (~100 kyr eccentricity). For this reason,  
422 the SPB is placed on a steep portion of the fire-productivity gradient curve. Overall, the mean  
423 charcoal abundance is relatively high, and no sustained periods of very low charcoal abundance are  
424 observed in the SPB record, which indicates that the climate never became too wet to fully limit fire  
425 activity at that time.

426 The Late Pliensbachian has been linked to a global cooling event, with a potential of 5–7 °C lowering  
427 in temperature inferred for the NW Tethys region (Korte et al., 2015). The atmospheric moisture  
428 holding capacity of a cooler climate is lower compared to a warm climate, in which a 1 °C cooling  
429 likely lowers the water holding capacity of air by 7% (Trenberth et al., 2005). The presence of  
430 terrestrial phytoclasts throughout confirms the presence of vegetation in the surrounding landmasses  
431 throughout this period. The mean abundance of charcoal for the LPE section is slightly lower than that  
432 of the SPB and the lowest charcoal abundances are coeval with a K/I enhancement, suggesting that  
433 during eccentricity minima environmental conditions moved further into the humid zone of the fire-  
434 productivity gradient (Fig. 5 blue line). Increasing eccentricity shifted the system to a more seasonal  
435 climate where the fire and clay records indicate the presence of a wet season that allowed for build-up  
436 of biomass followed by a dry season in which fire was able to be ignited and spread.

437 Conceptually, the relatively drier and cooler LPE climate would have resulted in conditions that are  
438 more arid, shifting to the biomass-limited part of the productivity/ aridity – fire frequency gradient  
439 during eccentricity maxima, compared to the SPB (Fig. 5 blue lines). This is supported by the large  
440 fluctuations observed between low fire frequency and high fire frequency for the LPE and the fact that  
441 estimated high fire periods did not occur suddenly, but rather were sustained over a larger part of the  
442 cycle. Therefore, the phase of highest fire frequency operating in the seasonal ‘fire window’ as  
443 indicated in figure 5 for the LPE (blue lines) likely occurred for a larger part of the fire productivity  
444 gradient. Hence, conditions across the LPE occurred across a wider range of the productivity/aridity  
445 spectrum of the fire frequency gradient (Fig. 5 blue lines) compared to the SPB. There is no evidence





446 that conditions ever became limited by aridity, and conditions during the LPE did not extend beyond  
447 the seasonal fire window into the arid part of the productivity/aridity spectrum of the fire frequency  
448 gradient.

449 Importantly, the Jurassic climate was overall warm and humid, about 5–10 °C warmer on global  
450 average compared to today (e.g., Rees et al., 2000; Sellwood & Valdes, 2008), with ~ 3.5–10 times the  
451 pre-industrial value of atmospheric  $p\text{CO}_2$  during the Early Jurassic (e.g. Retallack, 2001; Beerling &  
452 Royer, 2002; McElwain et al., 2005; Berner, 2006; Steinthorsdottir & Vajda, 2015; Li et al., 2020). In  
453 this context, it may not be surprising that a relative cooling event in the Early Jurassic did not lead to  
454 the aridity and biomass-limiting conditions observed during the last **glacial**, at latitudes of ~38 °C N  
455 (Daniau et al., 2007).

## 456 **5 Conclusions**

457 The study of two different climatic ‘background’ states, at the LPE and the SPB, shows that fire  
458 activity was strongly modulated by orbital eccentricity cycles. The 405 kyr shifts in the record of  
459 wildfire prevalence reflect similar changes also in the hydrological cycle (based on clay mineralogy  
460 data) showing that high fire activity occurred during periods of high seasonal contrast and that fire  
461 activity was suppressed during periods of high year-round humidity, because the latter would have  
462 enhanced the fuel moisture levels and prevented frequent **ignition**. The fire record of both climatic  
463 events is limited by the high fuel moisture levels during eccentricity minima, but fires were more  
464 prevalent during times of increased seasonality, every precession half-cycle during eccentricity  
465 maxima. Hence, during both events fire activity was limited by the moisture content and not by the  
466 productivity gradient. Both the SPB and the LPE climate systems were therefore situated on the  
467 moisture-limited side of the intermediate fire-productivity gradient (Fig. 5). Due to the lower  
468 moisture-holding capacity of cold air, the overall higher seasonality of the Late Pliensbachian and the  
469 more sustained high fire-frequency periods (based on the charcoal record for the LPE) we place the  
470 LPE towards the higher end of the aridity gradient, within maximum seasonality and maximum fire  
471 frequency window of the fire productivity graph (Fig. 5). The SPB fire regime reflected a more humid  
472 climate that shifted abruptly between low fire frequency to high fire frequency within less extreme  
473 bounds on the aridity gradient. This research reveals that the intermediate-fire productivity hypothesis  
474 (Pausas & Bradstock, 2007) can also be applied to high-resolution deep time records and that this  
475 hypothesis explains well the influence of orbital cycles within different overall climate states, be they  
476 cooling or warming trends. The coupling of high-resolution clay mineralogy and fossil charcoal  
477 records, combined with constraints on orbital forcing at such time, allows for inferences on how  
478 Earth’s natural climate state variability has driven shifts in terrestrial productivity through the  
479 geological past.



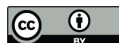

480 **Acknowledgements**

481 This is a contribution to the JET project funded by the Natural Environment Research Council  
482 (NERC) (grant number NE/N018508/1). All authors acknowledge funding from the International  
483 Continental Scientific Drilling Program (ICDP) and TPH acknowledges funding from the University  
484 of Exeter.

485 **Conflict of Interest**

486 The authors declare no conflicts of interest relevant to this study.

487 **Data Availability Statement**

488 Supplementary data are available at the National Geoscience Data Centre at Keyworth (NGDC)  
489 at <https://doi.org/10.5285/1461dbe5-50a8-425c-8c49-ac1f04bcc271> (Hollaar, 2022) for the interval  
490 934–918 m. b.s. All data presented for the interval 951–934 m. b.s. are available at the National  
491 Geoscience Data Centre at Keyworth (NGDC) at [https://doi.org/10.5285/d6b7c567-49f0-44c7-a94c-  
492 e82fa17ff98e](https://doi.org/10.5285/d6b7c567-49f0-44c7-a94c-e82fa17ff98e) (Hollaar et al., 2021b). All data for the interval 1271–1233 mbs is deposited at the  
493 University of Exeter: <http://hdl.handle.net/10871/133255>.

494 **Supporting Information**

495

496 **References**

- 497 Archibald, S., Lehmann, C. E., Belcher, C. M., Bond, W. J., Bradstock, R. A., Daniau, A. L., et al.  
498 (2018). Biological and geophysical feedbacks with fire in the Earth system. *Environmental Research  
499 Letters*, 13(3), 033003. <https://doi.org/10.1088/1748-9326/aa9ead>
- 500 Archibald, S., Lehmann, C. E., Gómez-Dans, J. L., & Bradstock, R. A. (2013). Defining pyromes and  
501 global syndromes of fire regimes. *Proceedings of the National Academy of Sciences*, 110(16), 6442 –  
502 6447. <https://doi.org/10.1073/pnas.1211466110>
- 503 Archibald, S., Roy, D. P., van Wilgen, B. W., & Scholes, R. J. (2009). What limits fire? An  
504 examination of drivers of burnt area in Southern Africa. *Global Change Biology*, 15(3), 613 – 630.  
505 <https://doi.org/10.1111/j.1365-2486.2008.01754.x>
- 506 Beerling, D. J., & Royer, D. L. (2002). Fossil plants as indicators of the Phanerozoic global carbon  
507 cycle. *Annual Review of Earth and Planetary Sciences*, 30(1), 527 – 556.  
508 <https://doi.org/10.1146/annurev.earth.30.091201.141413>
- 509 Belcher, C. M., Collinson, M. E., & Scott, A. C. (2005). Constraints on the thermal energy released  
510 from the Chicxulub impactor: new evidence from multi-method charcoal analysis. *Journal of the  
511 Geological Society*, 162(4), 591 – 602. <https://doi.org/10.1144/0016-764904-104>

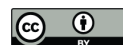

- 512 Berger, A., Loutre, M. F. & Dehant, V. Astronomical frequencies for pre-Quaternary palaeoclimate  
513 studies. *Terra Nova* 1, 474–479 (1989). <https://doi.org/10.1111/j.1365-3121.1989.tb00413.x>
- 514 Berner, R. A. (2006). GEOCARBSULF: a combined model for Phanerozoic atmospheric O<sub>2</sub> and  
515 CO<sub>2</sub>. *Geochimica et Cosmochimica Acta*, 70(23), 5653 – 5664.  
516 <https://doi.org/10.1016/j.gca.2005.11.032>
- 517 Bougeault, C., Pellenard, P., Deconinck, J. F., Hesselbo, S. P., Dommergues, J. L., Bruneau, L., et al.  
518 (2017). Climatic and palaeoceanographic changes during the Pliensbachian (Early Jurassic) inferred  
519 from clay mineralogy and stable isotope (CO) geochemistry (NW Europe). *Global and Planetary*  
520 *Change*, 149, 139 – 152. <https://doi.org/10.1016/j.gloplacha.2017.01.005>
- 521 Bowman, D. M., Murphy, B. P., Williamson, G. J., & Cochrane, M. A. (2014). Pyrogeographic  
522 models, feedbacks and the future of global fire regimes. *Global Ecology and Biogeography*, 23(7),  
523 821 – 824. <https://doi.org/10.1111/geb.12180>
- 524 Bradstock, R. A. (2010). A biogeographic model of fire regimes in Australia: current and future  
525 implications. *Global Ecology and Biogeography*, 19(2), 145 – 158. [https://doi.org/10.1111/j.1466-](https://doi.org/10.1111/j.1466-8238.2009.00512.x)  
526 [8238.2009.00512.x](https://doi.org/10.1111/j.1466-8238.2009.00512.x)
- 527 Chamley, H. (1989). *Clay Sedimentology*. Heidelberg: Springer Berlin Heidelberg.
- 528 Cochrane, M. A. (2003). Fire science for rainforests. *Nature*, 421(6926), 913 – 919.  
529 <https://doi.org/10.1038/nature01437>
- 530 Cochrane, M. A., & Ryan, K. C. (2009). Fire and fire ecology: Concepts and principles. *Tropical fire*  
531 *ecology*, 25 – 62. [https://doi.org/10.1007/978-3-540-77381-8\\_2](https://doi.org/10.1007/978-3-540-77381-8_2)
- 532 Daniau, A. L., Bartlein, P. J., Harrison, S. P., Prentice, I. C., Brewer, S., Friedlingstein, P., et al.  
533 (2012). Predictability of biomass burning in response to climate changes. *Global Biogeochemical*  
534 *Cycles*, 26(4). <https://doi.org/10.1029/2011GB004249>
- 535 Daniau, A. L., Sánchez-Goni, M. F., Beaufort, L., Laggoun-Défarge, F., Loutre, M. F., & Duprat, J.  
536 (2007). Dansgaard–Oeschger climatic variability revealed by fire emissions in southwestern  
537 Iberia. *Quaternary Science Reviews*, 26(9-10), 1369 – 1383.  
538 <https://doi.org/10.1016/j.quascirev.2007.02.005>
- 539 Danisch, J., Kabiri, L., Nutz, A., & Bodin, S. (2019). Chemostratigraphy of late Sinemurian–early  
540 Pliensbachian shallow-to deep-water deposits of the Central High Atlas Basin: Paleoenvironmental  
541 implications. *Journal of African Earth Sciences*, 153, 239 – 249.  
542 <https://doi.org/10.1016/j.jafrearsci.2019.03.003>



- 543 Deconinck, J. F., Hesselbo, S. P., & Pellenard, P. (2019). Climatic and sea-level control of Jurassic  
544 (Pliensbachian) clay mineral sedimentation in the Cardigan Bay Basin, Llanbedr (Mochras Farm)  
545 borehole, Wales. *Sedimentology*, 66(7), 2769 – 2783. <https://doi.org/10.1111/sed.12610>
- 546 De Graciansky, P. C., Dardeau, G., Dommergues, J. L., Durllet, C., Marchand, D., Dumont, T., et al.  
547 (1998). Ammonite biostratigraphic correlation and Early Jurassic sequence stratigraphy in France:  
548 comparisons with some UK sections. In: de Graciansky, P.C., Hardenbol, J., Jacquin, T., Farley, M. &  
549 Vail, P.R. (Eds.), *Mesozoic and Cenozoic Sequence Stratigraphy of European Basins. Special*  
550 *Publication of the Society for Sedimentary Geology (SEPM)*, 60, 583 – 622.
- 551 Glasspool, I. J., Edwards, D., & Axe, L. (2004). Charcoal in the Silurian as evidence for the earliest  
552 wildfire. *Geology*, 32(5), 381 – 383. <https://doi.org/10.1130/G20363.1>
- 553 Glasspool, I. J., & Gastaldo, R. A. (2022). Silurian wildfire proxies and atmospheric oxygen.  
554 *Geology*. <https://doi.org/10.1130/G50193.1>
- 555 Gómez, J. J., Comas-Rengifo, M. J., & Goy, A. (2016). Palaeoclimatic oscillations in the  
556 Pliensbachian (Early Jurassic) of the Asturian Basin (Northern Spain). *Climate of the Past*, 12(5),  
557 1199 – 1214. <https://doi.org/10.5194/cp-12-1199-2016>
- 558 Haq, B. U. (2018). Jurassic sea-level variations: a reappraisal. *GSA today*, 28(1), 4 – 10.  
559 <https://doi.org/10.1130/GSATG359A.1>
- 560 Hinnov, L. A., Ruhl, M. R., & Hesselbo, S. P. (2018). Reply to the Comment on “Astronomical  
561 constraints on the duration of the Early Jurassic Pliensbachian Stage and global climatic fluctuations”  
562 (Ruhl *et al.*, (2016). *Earth and Planetary Science Letters*, 455, 149 – 165).  
563 <https://doi.org/10.1016/j.epsl.2017.10.061>
- 564 Hesselbo, S.P. & Jenkyns, H.C. (1998). British Lower Jurassic sequence stratigraphy. In: de  
565 Graciansky, P.C., Hardenbol, J., Jacquin, T., Farley, M. & Vail, P.R. (Eds.), *Mesozoic–Cenozoic*  
566 *Sequence Stratigraphy of European Basins. Special Publication of the Society for Sedimentary*  
567 *Geology (SEPM)*, 60, 561 – 581.
- 568 Hollaar, T. P., Baker, S. J., Hesselbo, S. P., Deconinck, J. F., Mander, L., Ruhl, M., & Belcher, C. M.  
569 (2021). Wildfire activity enhanced during phases of maximum orbital eccentricity and precessional  
570 forcing in the Early Jurassic. *Communications Earth & Environment*, 2(1), 1 – 12.  
571 <https://doi.org/10.1038/s43247-021-00307-3>
- 572 Hollaar, T. P., Hesselbo, S. P., Deconinck, J. F., Damaschke, M., Ullmann, C. V., Jiang, M., &  
573 Belcher, C. M. (2023). Environmental changes during the onset of the Late Pliensbachian Event  
574 (Early Jurassic) in the Cardigan Bay Basin, Wales. *Climate of the Past*, 19(5), 979-997.  
575 <https://doi.org/10.5194/cp-19-979-2023>



- 576 Imbrie, J., & Imbrie, J. Z. (1980). Modeling the climatic response to orbital variations. *Science*,  
577 207(4434), 943 – 953. <https://doi.org/10.1126/science.207.4434.943>
- 578 Korte, C. & Hesselbo, S. P. (2011). Shallow marine carbon and oxygen isotope and elemental records  
579 indicate icehouse-greenhouse cycles during the Early Jurassic. *Paleoceanography*, 26(4).  
580 <https://doi.org/10.1029/2011PA002160>
- 581 Korte, C., Hesselbo, S. P., Ullmann, C. V., Dietl, G., Ruhl, M., Schweigert, G., & Thibault, N. (2015).  
582 Jurassic climate mode governed by ocean gateway. *Nature communications*, 6(1), 1 – 7.  
583 <https://doi.org/10.1038/ncomms10015>
- 584 Krawchuk, M. A., & Moritz, M. A. (2011). Constraints on global fire activity vary across a resource  
585 gradient. *Ecology*, 92(1), 121 – 132. <https://doi.org/10.1890/09-1843.1>
- 586 Legarreta, L., & Uliana, M. A. (1996). The Jurassic succession in west-central Argentina: stratal  
587 patterns, sequences and paleogeographic evolution. *Palaeogeography, Palaeoclimatology,*  
588 *Palaeoecology*, 120(3-4), 303 – 330. [https://doi.org/10.1016/0031-0182\(95\)00042-9](https://doi.org/10.1016/0031-0182(95)00042-9)
- 589 Li, X., Wang, J., Rasbury, T., Zhou, M., Wei, Z., & Zhang, C. (2020). Early Jurassic climate and  
590 atmospheric CO<sub>2</sub> concentration in the Sichuan paleobasin, southwestern China. *Climate of the Past*,  
591 16(6), 2055 – 2074. <https://doi.org/10.5194/cp-16-2055-2020>
- 592 Martinez, M. & Dera, G. (2015). Orbital pacing of carbon fluxes by a ~ 9-My eccentricity cycle  
593 during the Mesozoic. *Proceedings of the National Academy of Sciences*, 112, 12604 – 12609.  
594 <https://doi.org/10.1073/pnas.141994611>
- 595 McElwain, J. C., Wade-Murphy, J., & Hesselbo, S. P. (2005). Changes in carbon dioxide during an  
596 oceanic anoxic event linked to intrusion into Gondwana coals. *Nature*, 435(7041), 479 – 482.  
597 <https://doi.org/10.1038/nature03618>
- 598 Meyn, A., White, P. S., Buhk, C., & Jentsch, A. (2007). Environmental drivers of large, infrequent  
599 wildfires: the emerging conceptual model. *Progress in Physical Geography*, 31(3), 287 – 312.  
600 <https://doi.org/10.1177/0309133307079365>
- 601 Moore, D. M. & Reynolds Jr, R. C. (1997). *X-ray Diffraction and the Identification and Analysis of*  
602 *Clay Minerals*. Oxford: Oxford University Press.
- 603 Munier, T., Deconinck, J. F., Pellenard, P., Hesselbo, S. P., Riding, J. B., Ullmann, C. V., et al.  
604 (2021). Million-year-scale alternation of warm-humid and semi-arid periods as a mid-latitude climate  
605 mode in the Early Jurassic (late Sinemurian, Laurusian Seaway). *Climate of the Past*, 17(4), 1547 –  
606 1566. <https://doi.org/10.5194/cp-17-1547-2021>

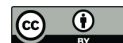

- 607 Oboh-Ikuenobe, F. E., Obi, C. G. & Jaramillo, C. A. (2005). Lithofacies, palynofacies, and sequence  
608 stratigraphy of Palaeogene strata in Southeastern Nigeria. *Journal of African Earth Sciences*, 41, 79–  
609 101. <https://doi.org/10.1016/j.jafrearsci.2005.02.002>
- 610 Pausas, J. G., & Bradstock, R. A. (2007). Fire persistence traits of plants along a productivity and  
611 disturbance gradient in mediterranean shrublands of south-east Australia. *Global Ecology and*  
612 *Biogeography*, 16(3), 330 – 340. <https://doi.org/10.1111/j.1466-8238.2006.00283.x>
- 613 Pausas, J. G., & Paula, S. (2012). Fuel shapes the fire–climate relationship: evidence from  
614 Mediterranean ecosystems. *Global Ecology and Biogeography*, 21(11), 1074 – 1082.  
615 <https://doi.org/10.1111/j.1466-8238.2012.00769.x>
- 616 Pausas, J. G., & Ribeiro, E. (2013). The global fire–productivity relationship. *Global Ecology and*  
617 *Biogeography*, 22(6), 728 – 736. <https://doi.org/10.1111/geb.12043>
- 618 Petschick, R. MacDiff 4.1. 2. Powder diffraction software (2000). Available from the author at  
619 <http://www.geol.uni-erlangen.de/html/software/Macdiff.html>.
- 620 Pieńkowski, G., Uchman, A., Ninard, K., & Hesselbo, S. P. (2021). Ichnology, sedimentology, and  
621 orbital cycles in the hemipelagic Early Jurassic Laurasian Seaway (Pliensbachian, Cardigan Bay  
622 Basin, UK). *Global and Planetary Change*, 207, 103648.  
623 <https://doi.org/10.1016/j.gloplacha.2021.103648>
- 624 Rees, P. M., Ziegler, A. M. & Valdes, P. J. (2000). Jurassic phytogeography and climates: new data  
625 and model comparisons. In Huber, B. T., Macleod, K. G. & Wing, S. L. (Eds.), *Warm Climates in*  
626 *Earth History*. (pp. 297 – 318). Cambridge: Cambridge University Press.
- 627 Retallack, G. J. (2001). A 300-million-year record of atmospheric carbon dioxide from fossil plant  
628 cuticles. *Nature*, 411(6835), 287 – 290. <https://doi.org/10.1038/35077041>
- 629 Riding, J. B., Leng, M. J., Kender, S., Hesselbo, S. P., & Feist-Burkhardt, S. (2013). Isotopic and  
630 palynological evidence for a new Early Jurassic environmental perturbation. *Palaeogeography,*  
631 *Palaeoclimatology, Palaeoecology*, 374, 16 – 27. <https://doi.org/10.1016/j.palaeo.2012.10.019>
- 632 Ruffell, A., McKinley, J. M. & Worden, R. H. (2002). Comparison of clay mineral stratigraphy to  
633 other proxy palaeoclimate indicators in the Mesozoic of NW Europe. *Philosophical Transactions of*  
634 *the Royal Society London A: Mathematical, Physical and Engineering Sciences*, 360, 675 – 693.  
635 <https://doi.org/10.1098/rsta.2001.0961>
- 636 Ruhl, M., Hesselbo, S. P., Hinnov, L., Jenkyns, H. C., Xu, W., Riding, J. B., et al. (2016).  
637 Astronomical constraints on the duration of the Early Jurassic Pliensbachian Stage and global climatic



- 638 fluctuations. *Earth and Planetary Science Letters*, 455, 149 – 165.
- 639 <https://doi.org/10.1016/j.epsl.2016.08.038>
- 640 Sellwood, B. W., & Valdes, P. J. (2008). Jurassic climates. *Proceedings of the Geologists'*
- 641 *Association*, 119(1), 5 – 17. [https://doi.org/10.1016/S0016-7878\(59\)80068-7](https://doi.org/10.1016/S0016-7878(59)80068-7)
- 642 Silva, R. L., Duarte, L. V., Wach, G. D., Ruhl, M., Sadki, D., Gómez, J. J. et al. (2021). An Early
- 643 Jurassic (Sinemurian–Toarcian) stratigraphic framework for the occurrence of organic matter
- 644 preservation intervals (OMPis). *Earth-Science Reviews*, 221, 103780.
- 645 Steinthorsdottir, M., & Vajda, V. (2015). Early Jurassic (late Pliensbachian) CO<sub>2</sub> concentrations
- 646 based on stomatal analysis of fossil conifer leaves from eastern Australia. *Gondwana Research*, 27(3),
- 647 932 – 939. <https://doi.org/10.1016/j.gr.2013.08.021>
- 648 Storm, M. S., Hesselbo, S. P., Jenkyns, H. C., Ruhl, M., Ullmann, C. V., Xu, W., et al. (2020). Orbital
- 649 pacing and secular evolution of the Early Jurassic carbon cycle. *Proceedings of the National Academy*
- 650 *of Sciences*, 117(8), 3974 – 3982. <https://doi.org/10.1073/pnas.1912094117>
- 651 Torsvik, T. H., & Cocks, L. R. M. (2017). Jurassic. In *Earth History and Palaeogeography*.
- 652 Cambridge: Cambridge University Press.
- 653 Trenberth, K. E., Fasullo, J., & Smith, L. (2005). Trends and variability in column-integrated
- 654 atmospheric water vapor. *Climate dynamics*, 24(7), 741 – 758. [https://doi.org/10.1007/s00382-005-](https://doi.org/10.1007/s00382-005-0017-4)
- 655 [0017-4](https://doi.org/10.1007/s00382-005-0017-4)
- 656 Ullmann, C. V., Szűcs, D., Jiang, M., Hudson, A. J., & Hesselbo, S. P. (2022). Geochemistry of
- 657 macrofossil, bulk rock and secondary calcite in the Early Jurassic strata of the Llanbedr (Mochras
- 658 Farm) drill core, Cardigan Bay Basin, Wales, UK. *Journal of the Geological Society*, 179(1).
- 659 <https://doi.org/10.1144/jgs2021-018>
- 660 van de Schootbrugge, B., Bailey, T. R., Rosenthal, Y., Katz, M. E., Wright, J. D., Miller, K. G., et al.
- 661 (2005). Early Jurassic climate change and the radiation of organic-walled phytoplankton in the Tethys
- 662 Ocean. *Paleobiology*, 31(1), 73 – 97. [https://doi.org/10.1666/0094-](https://doi.org/10.1666/0094-8373(2005)031<0073:EJCCAT>2.0.CO;2)
- 663 [8373\(2005\)031<0073:EJCCAT>2.0.CO;2](https://doi.org/10.1666/0094-8373(2005)031<0073:EJCCAT>2.0.CO;2)
- 664 van der Werf, G. R., Randerson, J. T., Giglio, L., Collatz, G. J., Kasibhatla, P. S., & Arellano Jr, A. F.
- 665 (2006). Interannual variability in global biomass burning emissions from 1997 to 2004. *Atmospheric*
- 666 *Chemistry and Physics*, 6(11), 3423 – 3441. <https://doi.org/10.5194/acp-6-3423-2006>
- 667
- 668
